# Supplementary material
Source: PubMed Central journal article supplement (PMC1297658)
Supplement: pnas_0505147102_2.pdf [file pnas_0505147102_2.pdf]

**Table 2. PHYLONET motifs**

| Matrix     | Sequence Logo                                                                       | P value   | Tollr   | Size of gene cluster |
|------------|-------------------------------------------------------------------------------------|-----------|---------|----------------------|
| YLR241W.1  |    | 0         | 3281.7  | 97                   |
| YDL216C.1  |    | 0         | 3227.8  | 346                  |
| YPL149W.2  |    | 0         | 3215.54 | 272                  |
| YER153C.2  |    | 0         | 3056.05 | 787                  |
| YML047C.1  |    | 0         | 2975.27 | 200                  |
| YKL124W.1  |    | 0         | 2728.64 | 326                  |
| YPR155C.1  |    | 0         | 2708.61 | 89                   |
| YHR114W.6  |   | 0         | 2669.65 | 486                  |
| YJR121W.2  |  | 0         | 2571.04 | 168                  |
| YHL012W.1  |  | 0         | 2173.55 | 237                  |
| YER013W.2  |  | 0         | 2006.38 | 284                  |
| YBR270C.1  |  | 0         | 1704.12 | 234                  |
| YIR015W.10 |  | 0         | 1394.53 | 558                  |
| YPL165C.1  |  | 2.30E-299 | 3316.64 | 785                  |
| YLR396C.1  |  | 1.03E-287 | 1932.32 | 365                  |
| YDL235C.1  |  | 2.54E-266 | 2239.41 | 167                  |
| YKL133C.1  |  | 3.63E-250 | 2430.42 | 184                  |
| YDL098C.1  |  | 5.93E-242 | 3145.24 | 405                  |
| YIR004W.1  |  | 2.97E-230 | 2052.84 | 97                   |
| YPL038W.1  |  | 8.65E-228 | 2286.87 | 341                  |

|              |                                                                                     |           |         |      |
|--------------|-------------------------------------------------------------------------------------|-----------|---------|------|
| YOR137C.1    |    | 1.25E-208 | 1970.77 | 199  |
| YGR276C.1    |    | 1.23E-190 | 2104.89 | 131  |
| YAL040C.4    |    | 5.63E-182 | 1745.97 | 2093 |
| YPL201C.1    |    | 1.13E-181 | 1338.47 | 133  |
| YLR244C.1    |    | 2.71E-177 | 1986.46 | 109  |
| YCR024C-A.10 |    | 3.49E-166 | 1344.65 | 38   |
| YMR020W.1    |    | 1.18E-160 | 1723.75 | 151  |
| YPR001W.3    |    | 3.71E-159 | 1961.52 | 42   |
| YPR169W.1    |    | 5.25E-157 | 2311.45 | 300  |
| YJR053W.1    |    | 2.09E-155 | 1567.12 | 102  |
| YJL166W.1    |    | 3.46E-155 | 2048.13 | 88   |
| YDR476C.1    |  | 4.51E-152 | 1850.84 | 826  |
| YPL148C.1    |  | 5.18E-152 | 1404.95 | 232  |
| YNL128W.1    |  | 2.30E-146 | 1535.17 | 281  |
| YDR294C.1    |  | 7.46E-146 | 1663.99 | 75   |
| YDR075W.1    |  | 6.38E-145 | 1767.63 | 161  |
| YBR143C.1    |  | 2.57E-133 | 1394.68 | 97   |
| YMR238W.1    |  | 2.94E-132 | 1536.98 | 47   |
| YOR155C.1    |  | 6.32E-128 | 1899.88 | 51   |
| YDL216C.9    |  | 1.85E-116 | 1368.67 | 306  |
| YML078W.1    |  | 2.97E-115 | 2044.47 | 131  |
| YJR126C.2    |  | 5.50E-113 | 1490.08 | 59   |
| YDL179W.1    |  | 5.69E-113 | 1557.21 | 117  |
| YMR104C.1    |  | 8.18E-110 | 1562.71 | 189  |

|           |  |           |         |     |
|-----------|--|-----------|---------|-----|
| YOR098C.1 |  | 2.25E-107 | 1234.25 | 120 |
| YKL222C.1 |  | 9.15E-101 | 1062.05 | 505 |
| YIL067C.5 |  | 1.78E-99  | 1339.53 | 263 |
| YLR012C.2 |  | 1.07E-96  | 995.66  | 135 |
| YMR260C.1 |  | 1.02E-95  | 904.91  | 69  |
| YOL071W.3 |  | 9.51E-95  | 877.99  | 170 |
| YLR249W.7 |  | 3.29E-94  | 1093.95 | 24  |
| YDR267C.1 |  | 2.36E-93  | 1069.9  | 44  |
| YCR024C.1 |  | 6.42E-93  | 1345.65 | 131 |
| YGR091W.1 |  | 1.12E-92  | 1255.13 | 264 |
| YNL188W.1 |  | 2.76E-90  | 1628.53 | 50  |
| YIL067C.6 |  | 5.75E-89  | 1304.29 | 83  |
| YPL132W.1 |  | 6.33E-87  | 1335.2  | 136 |
| YGR093W.1 |  | 2.60E-86  | 1192.9  | 326 |
| YGR096W.1 |  | 1.98E-83  | 1018.3  | 188 |
| YDR002W.1 |  | 4.00E-82  | 971.64  | 283 |
| YHR059W.1 |  | 5.47E-81  | 1537.6  | 605 |
| YGL021W.4 |  | 6.68E-78  | 1120.38 | 40  |
| YBL098W.3 |  | 1.40E-77  | 576.33  | 38  |
| YNL221C.1 |  | 2.94E-77  | 913.21  | 60  |
| YDR231C.7 |  | 1.30E-76  | 736.96  | 25  |
| YJR062C.1 |  | 1.67E-76  | 906.1   | 611 |
| YGL017W.1 |  | 1.00E-75  | 1231.12 | 415 |
| YML107C.1 |  | 3.17E-74  | 1303.06 | 404 |

|            |                                                                                     |          |         |     |
|------------|-------------------------------------------------------------------------------------|----------|---------|-----|
| YBR049C.1  |    | 8.29E-74 | 634.91  | 88  |
| YAL026C.1  |    | 1.04E-72 | 687.96  | 12  |
| YMR068W.1  |    | 1.83E-69 | 727.41  | 59  |
| YDR097C.1  |    | 2.45E-67 | 833.38  | 142 |
| YGR255C.1  |    | 5.92E-67 | 964.11  | 76  |
| YOR373W.1  |    | 1.73E-66 | 985.76  | 305 |
| YDR032C.3  |    | 3.03E-65 | 1430.8  | 160 |
| YJL057C.1  |    | 3.69E-65 | 1187.21 | 119 |
| YPR066W.1  |    | 5.29E-64 | 1128.03 | 131 |
| YBR070C.1  |    | 5.61E-63 | 763.88  | 154 |
| YFL028C.1  |    | 5.11E-62 | 1313.54 | 126 |
| YLR373C.10 |  | 1.91E-61 | 715.64  | 713 |
| YIL063C.1  |  | 2.45E-61 | 1033.36 | 121 |
| YMR108W.5  |  | 1.41E-60 | 695.49  | 121 |
| YCL050C.1  |  | 2.66E-56 | 466.34  | 39  |
| YMR111C.1  |  | 3.83E-53 | 882.33  | 100 |
| YMR134W.2  |  | 8.22E-52 | 506.29  | 162 |
| YBR252W.1  |  | 1.63E-51 | 1034.61 | 220 |
| YDR127W.1  |  | 2.93E-51 | 1093.15 | 270 |
| YMR006C.3  |  | 3.09E-51 | 772.25  | 345 |
| YDR276C.1  |  | 3.10E-51 | 687.44  | 113 |
| YNL252C.7  |  | 3.11E-51 | 570.12  | 56  |
| YJR010W.1  |  | 2.11E-50 | 448.08  | 53  |
| YDL206W.1  |  | 5.50E-50 | 1122.67 | 109 |

|            |  |          |        |     |
|------------|--|----------|--------|-----|
| YMR134W.3  |  | 1.02E-49 | 393.72 | 46  |
| YER105C.10 |  | 3.40E-49 | 607.68 | 69  |
| YOR156C.1  |  | 3.25E-48 | 679.14 | 254 |
| YBL098W.7  |  | 5.59E-48 | 618.57 | 37  |
| YDR321W.1  |  | 5.81E-48 | 461.04 | 22  |
| YHL035C.9  |  | 1.22E-47 | 451.35 | 146 |
| YPL069C.1  |  | 2.48E-47 | 578.16 | 59  |
| YLR369W.1  |  | 5.42E-47 | 805.33 | 19  |
| YLR307W.1  |  | 1.15E-46 | 945.63 | 34  |
| YDR322W.1  |  | 2.87E-45 | 599.26 | 41  |
| YKL149C.4  |  | 8.26E-45 | 598.16 | 148 |
| YDR263C.3  |  | 1.52E-44 | 455.7  | 13  |
| YBR151W.3  |  | 2.44E-44 | 767.13 | 69  |
| YBL098W.9  |  | 2.47E-44 | 537.12 | 12  |
| YPL132W.5  |  | 3.55E-44 | 670.3  | 23  |
| YMR241W.1  |  | 4.23E-44 | 464.79 | 56  |
| YBR200W.1  |  | 9.52E-44 | 772.76 | 37  |
| YEL061C.1  |  | 1.57E-43 | 612.1  | 78  |
| YGR094W.7  |  | 3.47E-42 | 581.23 | 141 |
| YOL011W.1  |  | 5.33E-42 | 573.88 | 48  |
| YOR129C.1  |  | 1.02E-41 | 672.53 | 36  |
| YDR255C.2  |  | 4.99E-41 | 424.46 | 11  |
| YJR117W.1  |  | 5.08E-41 | 856.23 | 70  |
| YMR210W.4  |  | 1.03E-39 | 407.89 | 34  |

|             |  |          |        |     |
|-------------|--|----------|--------|-----|
| YLR055C.1   |  | 5.01E-39 | 439.69 | 208 |
| YNL144C.10  |  | 1.24E-38 | 287.65 | 34  |
| YKL033W-A.7 |  | 1.83E-38 | 671.02 | 13  |
| YKL205W.1   |  | 1.85E-38 | 553.61 | 140 |
| YKL073W.10  |  | 5.21E-38 | 475.75 | 33  |
| YOR089C.1   |  | 7.41E-38 | 392.2  | 38  |
| YMR251W-A.6 |  | 8.23E-38 | 179.57 | 14  |
| YMR291W.1   |  | 6.13E-37 | 428.56 | 38  |
| YOR177C.9   |  | 1.04E-36 | 567.47 | 23  |
| YER022W.1   |  | 3.82E-36 | 655.16 | 76  |
| YNL080C.1   |  | 4.51E-36 | 473.43 | 104 |
| YPL074W.1   |  | 4.80E-36 | 480.45 | 28  |
| YER028C.1   |  | 5.95E-36 | 313.73 | 29  |
| YNL009W.10  |  | 1.22E-35 | 337.89 | 19  |
| YML105C.4   |  | 4.16E-35 | 466.44 | 48  |
| YPR122W.1   |  | 9.60E-35 | 790.98 | 217 |
| YBR260C.1   |  | 1.21E-34 | 691.79 | 120 |
| YOR341W.1   |  | 2.03E-34 | 357.37 | 116 |
| YGL007W.2   |  | 2.11E-34 | 457.89 | 628 |
| YDL028C.7   |  | 2.24E-34 | 582.47 | 40  |
| YOR280C.5   |  | 4.59E-34 | 235.64 | 19  |
| YEL009C.6   |  | 6.95E-33 | 274.09 | 16  |
| YPL060W.1   |  | 8.43E-33 | 849.26 | 37  |
| YBR200W.3   |  | 1.00E-32 | 721.87 | 125 |

|            |                                                                                     |          |        |     |
|------------|-------------------------------------------------------------------------------------|----------|--------|-----|
| YLR167W.1  |    | 5.64E-32 | 714.64 | 157 |
| YKL114C.3  |    | 7.19E-32 | 520.67 | 44  |
| YDL129W.3  |    | 2.40E-31 | 415.61 | 93  |
| YHL030W.8  |    | 2.63E-31 | 468.52 | 99  |
| YDR458C.7  |    | 5.63E-31 | 675.39 | 53  |
| YGL097W.1  |    | 1.26E-30 | 512.52 | 156 |
| YMR206W.1  |    | 4.37E-30 | 347.85 | 50  |
| YGL005C.1  |    | 7.89E-30 | 496.19 | 70  |
| YER110C.6  |    | 1.06E-29 | 528.7  | 17  |
| YNR034W.2  |    | 1.10E-29 | 517.01 | 46  |
| YNL161W.1  |    | 1.72E-29 | 504.39 | 21  |
| YBR215W.3  |  | 2.24E-29 | 474.92 | 27  |
| YLR276C.10 |  | 5.03E-29 | 548.91 | 64  |
| YOR165W.1  |  | 1.95E-28 | 348.02 | 125 |
| YLR392C.1  |  | 7.07E-28 | 448.17 | 179 |
| YKR061W.1  |  | 1.06E-27 | 761.55 | 67  |
| YJR007W.1  |  | 1.39E-27 | 396.92 | 20  |
| YJL005W.7  |  | 2.14E-27 | 371.45 | 86  |
| YGR110W.1  |  | 2.20E-27 | 496.77 | 108 |
| YBR158W.1  |  | 5.87E-27 | 397.79 | 24  |
| YMR180C.3  |  | 1.77E-26 | 505.13 | 65  |
| YBR166C.5  |  | 2.60E-26 | 918.35 | 64  |
| YLR264W.1  |  | 1.19E-25 | 756.28 | 53  |
| YBR286W.8  |  | 1.42E-25 | 374.8  | 11  |

|             |                                                                                     |          |        |     |
|-------------|-------------------------------------------------------------------------------------|----------|--------|-----|
| YGL079W.1   |    | 3.86E-25 | 169.98 | 17  |
| YNL165W.6   |    | 6.16E-25 | 254.56 | 31  |
| YPR021C.6   |    | 2.11E-24 | 206.47 | 13  |
| YOL126C.4   |    | 3.73E-24 | 346.85 | 73  |
| YPL202C.8   |    | 4.47E-24 | 323.78 | 17  |
| YHR088W.1   |    | 5.24E-24 | 538.97 | 42  |
| YOR377W.2   |    | 7.80E-24 | 474.94 | 32  |
| YLR292C.2   |    | 1.20E-23 | 299.73 | 33  |
| YML003W.2   |    | 1.66E-23 | 324.14 | 242 |
| YJL180C.3   |    | 5.01E-23 | 692.66 | 544 |
| YGR218W.8   |    | 5.35E-23 | 413.1  | 26  |
| YDR322W.7   |  | 8.67E-23 | 334.32 | 15  |
| YDR519W.1   |  | 1.08E-22 | 571.29 | 75  |
| YEL048C.3   |  | 1.76E-22 | 560.97 | 52  |
| YCL057C-A.5 |  | 2.42E-22 | 198.72 | 17  |
| YMR319C.1   |  | 2.63E-22 | 470.29 | 43  |
| YGR120C.3   |  | 3.52E-22 | 357.83 | 68  |
| YOL126C.5   |  | 3.84E-22 | 198.13 | 10  |
| YIL119C.1   |  | 5.35E-22 | 184.93 | 12  |
| YOL034W.1   |  | 5.57E-22 | 539.08 | 104 |
| YPR070W.1   |  | 6.24E-22 | 412.66 | 30  |
| YER165W.9   |  | 6.83E-22 | 328.65 | 30  |
| YJL132W.9   |  | 2.16E-21 | 333.09 | 101 |
| YIL055C.7   |  | 2.48E-21 | 172.76 | 20  |



|             |                                                                                     |          |        |     |
|-------------|-------------------------------------------------------------------------------------|----------|--------|-----|
| YLR075W.3   |    | 2.52E-21 | 128.21 | 10  |
| YOR321W.9   |    | 3.22E-21 | 305.67 | 230 |
| YJR075W.5   |    | 8.81E-21 | 695.19 | 77  |
| YDR297W.7   |    | 8.94E-21 | 204.63 | 40  |
| YDR345C.1   |    | 8.97E-21 | 312.47 | 26  |
| YGL180W.8   |    | 9.11E-21 | 256.83 | 15  |
| YNL221C.7   |    | 9.21E-21 | 321.76 | 67  |
| YJR094W-A.9 |    | 1.70E-20 | 316.81 | 19  |
| YDR139C.6   |    | 2.35E-20 | 481.25 | 27  |
| YLR175W.9   |    | 8.60E-20 | 527.27 | 73  |
| YNL275W.3   |    | 9.82E-20 | 384.4  | 30  |
| YNL078W.10  |  | 1.21E-19 | 293.28 | 152 |
| YNL069C.4   |  | 1.23E-19 | 287.19 | 18  |
| YCR011C.3   |  | 1.77E-19 | 270.24 | 10  |
| YLR372W.1   |  | 2.27E-19 | 276.73 | 13  |
| YLR356W.6   |  | 2.70E-19 | 198.47 | 15  |
| YGR263C.1   |  | 3.13E-19 | 429.86 | 60  |
| YNL080C.6   |  | 3.63E-19 | 197.26 | 40  |
| YBL055C.1   |  | 3.70E-19 | 288.88 | 251 |
| YPR004C.1   |  | 8.92E-19 | 485.54 | 85  |
| YER034W.8   |  | 1.48E-18 | 213.48 | 43  |
| YOR120W.5   |  | 7.21E-18 | 236.16 | 20  |
| YDL091C.3   |  | 8.54E-18 | 270.53 | 20  |
| YLL024C.4   |  | 9.94E-18 | 467.71 | 121 |

|            |                                                                                     |          |        |     |
|------------|-------------------------------------------------------------------------------------|----------|--------|-----|
| YLL054C.2  |    | 1.51E-17 | 286.89 | 20  |
| YHR152W.3  |    | 1.65E-17 | 379.21 | 52  |
| YER042W.9  |    | 2.85E-17 | 308.01 | 20  |
| YBL013W.6  |    | 3.01E-17 | 184.15 | 27  |
| YER122C.10 |    | 3.34E-17 | 280.93 | 22  |
| YHR046C.2  |    | 5.05E-17 | 308.75 | 54  |
| YPL273W.2  |    | 1.62E-16 | 358.65 | 34  |
| YHR046C.5  |    | 2.10E-16 | 526.71 | 80  |
| YGL070C.9  |    | 2.40E-16 | 220.32 | 19  |
| YLL054C.3  |    | 3.41E-16 | 346.65 | 37  |
| YMR142C.1  |    | 3.63E-16 | 185.94 | 15  |
| YJR001W.4  |  | 5.85E-16 | 237.55 | 29  |
| YEL021W.1  |  | 8.84E-16 | 333.22 | 26  |
| YGR075C.9  |  | 9.43E-16 | 177.49 | 17  |
| YJR075W.6  |  | 1.24E-15 | 425.35 | 32  |
| YBL014C.9  |  | 1.34E-15 | 171.6  | 10  |
| YLR414C.6  |  | 1.56E-15 | 529.17 | 36  |
| YNL055C.3  |  | 1.90E-15 | 178.5  | 10  |
| YDR214W.7  |  | 2.94E-15 | 312.83 | 16  |
| YML073C.3  |  | 3.51E-15 | 229.75 | 10  |
| YGL001C.9  |  | 3.66E-15 | 304.73 | 18  |
| YDR531W.1  |  | 4.20E-15 | 254.73 | 34  |
| YDR218C.10 |  | 4.48E-15 | 538.69 | 108 |
| YOR176W.4  |  | 4.89E-15 | 153.26 | 22  |

|            |                                                                                     |          |        |     |
|------------|-------------------------------------------------------------------------------------|----------|--------|-----|
| YER028C.7  |    | 5.62E-15 | 178.98 | 23  |
| YKL096W.9  |    | 1.04E-14 | 188.1  | 17  |
| YOL001W.10 |    | 1.10E-14 | 237.44 | 5   |
| YLR132C.2  |    | 1.34E-14 | 173.31 | 10  |
| YGL229C.5  |    | 3.35E-14 | 150.79 | 11  |
| YOR079C.1  |    | 3.75E-14 | 338.75 | 34  |
| YDL204W.8  |    | 3.80E-14 | 275.57 | 54  |
| YDL111C.4  |    | 5.05E-14 | 459.87 | 18  |
| YHR185C.9  |    | 5.72E-14 | 403.12 | 27  |
| YCR002C.7  |    | 9.83E-14 | 225.05 | 19  |
| YBR043C.9  |    | 1.56E-13 | 198.47 | 14  |
| YHL039W.9  |  | 2.18E-13 | 139.57 | 15  |
| YOR319W.9  |  | 3.23E-13 | 222.09 | 34  |
| YJL057C.4  |  | 3.55E-13 | 630.5  | 220 |
| YDR468C.6  |  | 4.54E-13 | 407.62 | 35  |
| YCL052C.10 |  | 5.56E-13 | 223.92 | 65  |
| YOR175C.9  |  | 6.50E-13 | 228.84 | 14  |
| YIL011W.9  |  | 1.13E-12 | 235.21 | 28  |
| YER129W.8  |  | 1.41E-12 | 201.73 | 26  |
| YOR317W.8  |  | 3.70E-12 | 194.49 | 31  |
| YPR194C.2  |  | 4.29E-12 | 199.25 | 20  |
| YKL011C.1  |  | 6.78E-12 | 397.36 | 51  |
| YGL256W.10 |  | 1.04E-11 | 127.53 | 8   |
| YER178W.3  |  | 1.16E-11 | 171.56 | 13  |

|            |  |          |        |     |
|------------|--|----------|--------|-----|
| YLR098C.9  |  | 1.75E-11 | 176.57 | 15  |
| YBR200W.10 |  | 1.87E-11 | 140.3  | 13  |
| YKL140W.2  |  | 2.84E-11 | 488.88 | 121 |
| YLR098C.10 |  | 3.85E-11 | 127.93 | 12  |
| YDR318W.5  |  | 4.47E-11 | 179.49 | 8   |
| YBL049W.9  |  | 8.15E-11 | 160.79 | 13  |
| YEL029C.3  |  | 1.71E-10 | 162.11 | 51  |
| YOR363C.1  |  | 2.13E-10 | 140.91 | 15  |
| YOL028C.4  |  | 2.26E-10 | 158.55 | 21  |
| YPL226W.9  |  | 4.30E-10 | 273.1  | 37  |
| YOR373W.10 |  | 4.18E-09 | 157.8  | 13  |
| YEL036C.10 |  | 9.28E-09 | 249.56 | 85  |
| YOR002W.2  |  | 1.46E-08 | 106.51 | 10  |
| YPL117C.9  |  | 1.57E-08 | 102.31 | 7   |
| YPL258C.1  |  | 1.87E-08 | 151.56 | 11  |
| YLR405W.6  |  | 2.43E-08 | 248.17 | 9   |
| YIL021W.2  |  | 2.50E-08 | 125.91 | 14  |
| YEL003W.2  |  | 5.36E-08 | 175.77 | 17  |
| YKL071W.1  |  | 5.48E-08 | 140.04 | 12  |
| YOR298W.2  |  | 8.47E-08 | 108.8  | 11  |
| YGL124C.3  |  | 2.67E-07 | 104.76 | 11  |
| YMR036C.4  |  | 3.41E-07 | 252.1  | 16  |
| YLR116W.5  |  | 3.84E-07 | 181.82 | 21  |
| YGR097W.5  |  | 3.90E-07 | 150.12 | 70  |

|            |                                                                                     |          |        |    |
|------------|-------------------------------------------------------------------------------------|----------|--------|----|
| YOL027C.9  |    | 6.94E-07 | 104.07 | 11 |
| YJL130C.1  |    | 7.40E-07 | 280.78 | 13 |
| YMR105C.9  |    | 9.94E-07 | 118.07 | 15 |
| YNL257C.5  |    | 1.23E-06 | 164.55 | 15 |
| YOR108W.7  |    | 1.58E-06 | 329.71 | 30 |
| YKR015C.8  |    | 1.65E-06 | 141.32 | 13 |
| YOR245C.3  |    | 3.02E-06 | 129.96 | 11 |
| YBR080C.3  |    | 4.28E-06 | 108.33 | 10 |
| YGR263C.10 |    | 4.50E-06 | 247    | 21 |
| YJL091C.2  |    | 8.39E-06 | 366.45 | 27 |
| YCR033W.5  |    | 8.51E-06 | 119.5  | 10 |
| YDR279W.5  |  | 8.67E-06 | 271.72 | 54 |

This table summarizes the 296 PHYLONET motifs. Column 1: Unique identifier of the motif. The identifier contains the query gene system name and an index representing the rank of this motif among all qualified motifs identified for this query gene. Column 2: Sequence logo of the motif generated using custom software. Column 3: *P* value of the motif. Column 4: Total Average Log-likelihood Ratio (ALLR) score of the motif. Column 5: Size of the cluster of genes that share the motif.
